# Supplementary material
Source: MDPI journal article supplement (https://www.mdpi.com/2071-1050/9/2/242)
Supplement: s1 [file s1]

Supplementary Materials: Examining the Interaction of Taxi and Subway Ridership for Sustainable Urbanization

Miaoyi Li, Lei Dong, Zhenjiang Shen, Wei Lang and Xinyue Ye

**Table S1.** Daily number of taxi trips in different time periods.

|  | **April** | | **September** | |
| --- | --- | --- | --- | --- |
|  | Weekday | Weekend | Weekday | Weekend |
| Taxi | 8,944 (145) | 9,221 (327) | 7,191 (180) | 7,714 (380) |

**Table S2.** Total daily taxi volume around the subway station.

|  | **April** | | **September** | |
| --- | --- | --- | --- | --- |
|  | Weekday | Weekend | Weekday | Weekend |
| Taxi | 8,944 (145) | 9,221 (327) | 7,191 (180) | 7,714 (380) |

**Table S3.** Taxi pick-ups and drop-offs (weekday) in April and September.

|  | **Minimum** | **Median** | **Mean** | **Maximum** |
| --- | --- | --- | --- | --- |
| April | 0.43 | 1.61 | 2.97 | 44.50 |
| September | 0.40 | 1.50 | 2.72 | 19.00 |
